# Supplementary material for: Insertion of benzyne into the Pd–C bond. Synthesis of unnatural amino acid derivatives by sequential insertion of benzyne and CO: 2,2′-functionalized biaryls containing alkylamino and carboxymethyl substituents. Isolation of stable carbopalladated-benzyne intermediates
Source: Royal Society of Chemistry journal article supplement (doi:10.1039/c2cc32975a), 2012-01-01
Supplement: c2cc32975a.pdf [file c2cc32975a.pdf]

S1

## SUPPORTING INFORMATION

### Insertion of benzyne into the Pd–C bond. Synthesis of unnatural amino acid derivatives by sequential insertion of benzyne and CO: 2,2'-functionalized biaryls containing alkylamino and carboxymethyl substituents. Isolation of stable carbopalladated-benzyne intermediates

José-Antonio García López, María-José Oliva-Madrid, Isabel Saura-Llamas, Delia Bautista and José Vicente

#### Experimental Section

**General Procedures.** Melting points were determined on a Reicher apparatus and are uncorrected. Elemental analyses were carried out with a Carlo Erba 1106 microanalyzer. Exact masses were recorded on an AUTOSPEC 5000 VG mass spectrometer. IR spectra were recorded on a Perkin-Elmer 16F PC FT-IR spectrometer with Nujol mulls between polyethylene sheets. NMR spectra were recorded on a Bruker Avance 300 or 400 spectrometer, at room temperature. Chemical shifts were referenced to TMS ( $^1\text{H}$ ,  $^{13}\text{C}\{^1\text{H}\}$ ) or  $\text{H}_3\text{PO}_4$  ( $^{31}\text{P}\{^1\text{H}\}$ ). NMR assignments were performed with the help of APT, HMQC and HMBC techniques. Chart 1 shows the atom numbering used for NMR assignments.

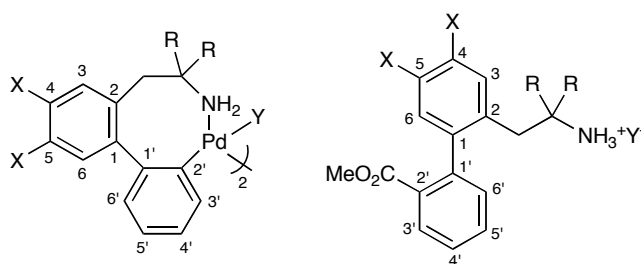

Chart 1. Numbering Scheme

**Synthesis of  $[\text{Pd}(\text{C},N\text{-C}_6\text{H}_4\{(\text{C}_6\text{H}_4\text{CH}_2\text{CMe}_2\text{NH}_2\text{-2})\text{-2'})](\mu\text{-Cl})_2$  (1a).** A solution of 2-(trimethylsilyl)phenyl trifluoromethanesulphonate (370  $\mu\text{L}$ , 1.52 mmol) in dry  $\text{CH}_3\text{CN}$  (10 mL) was added dropwise to a suspension of palladacycle **A** (250 mg, 0.431 mmol) and  $\text{CsF}$  (300 mg, 1.975 mmol) in dry  $\text{CH}_3\text{CN}$  (10 mL) under  $\text{N}_2$  atmosphere. The mixture was stirred for 48 h and filtered through a plug of Celite. The solvent from the orange filtrate was

S2

removed, and CH<sub>2</sub>Cl<sub>2</sub> (40 mL) was added. The solution was washed with H<sub>2</sub>O (2 x 15 mL) to remove inorganic salts, and the combined organic layers were dried over MgSO<sub>4</sub>. The suspension was filtered, the pale orange filtrate was concentrated to ca. 1 mL, and Et<sub>2</sub>O (15 mL) was added. The resulting suspension was filtered, and the solid was washed with Et<sub>2</sub>O (2 x 5 mL) and air-dried to afford the complex **1a** as a pale yellow solid. Yield: 200 mg, 0.273 mmol, 63%. Mp: 192 °C. Anal. Calcd for C<sub>32</sub>H<sub>36</sub>Cl<sub>2</sub>N<sub>2</sub>Pd<sub>2</sub> (732.397): C, 52.48; H, 4.95; N, 3.82. Found: C, 52.09; H, 5.25; N, 3.86. IR (cm<sup>-1</sup>): ν(NH) 3282 (m), 3117 (m). <sup>1</sup>H NMR (400.91 MHz, DMSO-*d*<sub>6</sub>): δ 1.26 (s, 3 H, Me, CMe<sub>2</sub>), 1.29 (s, 3 H, Me, CMe<sub>2</sub>), 2.24 (br d, 1 H, CH<sub>2</sub>Ar, <sup>2</sup>J<sub>HH</sub> = 14.0 Hz), 2.44 (br d partially obscured by the resonance of DMSO, 1 H, CH<sub>2</sub>Ar, <sup>2</sup>J<sub>HH</sub> = 14.4 Hz), 3.63 (br d, 1 H, NH<sub>2</sub>, <sup>2</sup>J<sub>HH</sub> = 11.2 Hz), 3.84 (br d, 1 H, NH<sub>2</sub>, <sup>2</sup>J<sub>HH</sub> = 10.4 Hz), 6.83 (dd, 1 H, H6', <sup>3</sup>J<sub>HH</sub> = 6.8, <sup>4</sup>J<sub>HH</sub> = 2.0 Hz), 7.02 (m, 2 H, H3' + H4'), 7.13 (m, 1 H, H6), 7.28–7.35 (m, 4 H, H3 + H4 + H5 + H5'). <sup>13</sup>C{<sup>1</sup>H} NMR (100.81 MHz, DMSO-*d*<sub>6</sub>): δ 28.0 (s, Me, CMe<sub>2</sub>), 33.4 (s, Me, CMe<sub>2</sub>), 44.0 (s, CH<sub>2</sub>Ar), 55.7 (s, CMe<sub>2</sub>), 123.9 (s, CH, C3'), 125.9 (s, CH, C5), 126.1 (s, CH, C4'), 126.3 (s, CH, C4), 127.0 (s, CH, C6'), 128.8 (s, CH, C6), 132.2 (s, CH, C3), 133.9 (s, CH, C5'), 136.3 (s, C2), 145.8 (s, C1), 146.1 (s, C1'), 150.3 (s, C2').

**Synthesis of [Pd(C,N-C<sub>6</sub>H<sub>4</sub>{(C<sub>6</sub>H<sub>2</sub>CH<sub>2</sub>CH<sub>2</sub>NH<sub>2</sub>-2,(OMe)<sub>2</sub>-4,5)-2'})](μ-Br)]<sub>2</sub> (**1b**).** A solution of 2-(trimethylsilyl)phenyl trifluoromethanesulphonate (298 μL, 1.227 mmol) in dry CH<sub>3</sub>CN (20 mL) was added dropwise to a suspension of palladacycle **B** (300 mg, 0.409 mmol) and CsF (186 mg, 1.227 mmol) in dry CH<sub>3</sub>CN (10 mL) under N<sub>2</sub> atmosphere. The mixture was stirred for 48 h, the solvent was removed, CH<sub>2</sub>Cl<sub>2</sub> (30 mL) was added, and the suspension was filtered through a plug of MgSO<sub>4</sub>. The filtrate was washed with H<sub>2</sub>O (3 x 10 mL), the combined organic layers were dried over MgSO<sub>4</sub> and filtered. The solvent was removed to ca. 2 mL, and Et<sub>2</sub>O (30 mL) was added. The suspension was filtered, and the solid was washed with Et<sub>2</sub>O (2 x 5 mL) and air-dried to afford a first crop of complex **1b** as a dark orange solid (280 mg). The filtrate was concentrated to ca. 2 mL, and *n*-pentane (20 mL) was added. The suspension was filtered, and the solid was washed with *n*-pentane (2 x 5 mL) and air-dried to give a second crop of complex **1b** as a dark orange solid (24 mg). Yield: 304 mg, 0.343 mmol, 84%. Mp: 182 °C. Anal. Calcd for C<sub>32</sub>H<sub>36</sub>Br<sub>2</sub>N<sub>2</sub>O<sub>4</sub>Pd<sub>2</sub> (885.297): C, 43.41; H, 4.10; N, 3.16. Found: C, 43.29; H, 4.06; N, 3.16. IR (cm<sup>-1</sup>): ν(NH) 3306 w, 3249 m. <sup>1</sup>H NMR (300.1 MHz, DMSO-*d*<sub>6</sub>): δ 2.00 (m, 1 H, CH<sub>2</sub>Ar), 2.59 (br dd, 1 H, CH<sub>2</sub>Ar, <sup>2</sup>J<sub>HH</sub> = 14.6, <sup>3</sup>J<sub>HH</sub>

S3

= 4.7 Hz), 2.88 (m, 1 H, CH<sub>2</sub>N), 3.01–3.08 (m, 1 H, CH<sub>2</sub>N), 3.71 (s, 3 H, MeO), 3.73–3.78 (m, partially obscured by the MeO signal, 1 H, NH<sub>2</sub>), 3.79 (s, 3 H, MeO), 3.73–4.05 (br d, 1 H, NH<sub>2</sub>, <sup>2</sup>J<sub>HH</sub> = 9.5 Hz), 6.67 (s, 1 H, H<sub>6</sub>), 6.91 (br dd, H<sub>6</sub>', <sup>2</sup>J<sub>HH</sub> = 6.5, <sup>3</sup>J<sub>HH</sub> = 1.9 Hz), 6.95 (s, 1 H, H<sub>3</sub>), 6.97–7.04 (m, 2 H, H<sub>4</sub>' + H<sub>5</sub>'), 7.27 (br dd, H<sub>3</sub>', <sup>2</sup>J<sub>HH</sub> = 8.4 Hz, <sup>3</sup>J<sub>HH</sub> = 1.8 Hz). <sup>13</sup>C{<sup>1</sup>H} NMR (100.81 MHz, DMSO-*d*<sub>6</sub>): δ 32.9 (s, CH<sub>2</sub>Ar), 47.2 (s, CH<sub>2</sub>N), 55.5 (s, MeO), 55.7 (s, MeO), 112.4 (s, CH, C<sub>6</sub>), 113.5 (s, CH, C<sub>3</sub>), 123.9 (s, CH, C<sub>5</sub>'), 126.3 (s, CH, C<sub>4</sub>'), 127.2 (s, CH, C<sub>6</sub>'), 131.9 (s, C<sub>2</sub>), 133.7 (s, CH, C<sub>3</sub>'), 137.1 (s, C<sub>1</sub>), 145.9 (s, C<sub>1</sub>'), 146.4 (s, C<sub>5</sub>), 148.0 (s, C<sub>4</sub>). The <sup>13</sup>C NMR resonance corresponding to the C<sub>2</sub>' was not observed.

Although the elemental analysis of complex **1b** agrees with the proposed structure, its <sup>1</sup>H NMR spectra shows a small impurity (ca. 95:5, according to resonances corresponding to the OMe groups), which cannot be removed by fractional crystallization or chromatography techniques. Nevertheless, crude **1b** can be used as starting material to prepare **2b** and **3b**.

**Synthesis of [Pd(C,N-C<sub>6</sub>H<sub>4</sub>{(C<sub>6</sub>H<sub>4</sub>CH<sub>2</sub>CMe<sub>2</sub>NH<sub>2</sub>-2)-2'})Cl(4-pic)] (2a).** 4-Picoline (30 μL, 0.308 mmol) was added to a suspension of complex **1a** (100 mg, 0.137 mmol) in CH<sub>2</sub>Cl<sub>2</sub> (10 mL). The resulting pale yellow solution was stirred for 20 min, concentrated to ca. 2 mL, and Et<sub>2</sub>O (25 mL) was added. The suspension was filtered, and the solid was washed with Et<sub>2</sub>O (2 x 5 mL) and air-dried to afford complex **2a** as pale yellow solid. Yield: 120 mg, 0.261 mmol, 95%. Mp: 181 °C. Anal. Calcd for C<sub>22</sub>H<sub>25</sub>ClN<sub>2</sub>Pd (459.327): C, 57.53; H, 5.47; N, 6.10. Found: C, 57.35; H, 5.81; N, 6.14. IR (cm<sup>-1</sup>): ν(NH) 3293 (m), 3188 (m), 3114 (m); ν(C=N) 1616 (m). <sup>1</sup>H NMR (400.91 MHz): δ 1.33 (s, 3 H, Me, CMe<sub>2</sub>), 1.62 (s, 3 H, Me, CMe<sub>2</sub>), 2.23 (s, 3 H, Me, pic), 2.29 (br d, 1 H, NH<sub>2</sub>, <sup>2</sup>J<sub>HH</sub> = 10.0 Hz), 2.34 (d, 1 H, CH<sub>2</sub>Ar, <sup>2</sup>J<sub>HH</sub> = 14.4 Hz), 2.53 (dd, 1 H, CH<sub>2</sub>Ar, <sup>2</sup>J<sub>HH</sub> = 13.5, <sup>4</sup>J<sub>HH</sub> = 1.2 Hz), 3.20 (br d, 1 H, NH<sub>2</sub>, <sup>2</sup>J<sub>HH</sub> = 10.0 Hz), 6.86–6.89 (m, 3 H, H<sub>2</sub>' + *m*-H of pic), 6.93 (d, 1 H, H<sub>5</sub>, <sup>3</sup>J<sub>HH</sub> = 7.2 Hz), 6.97 (td, 1 H, H<sub>3</sub>', <sup>3</sup>J<sub>HH</sub> = 7.2, <sup>4</sup>J<sub>HH</sub> = 1.2 Hz), 7.02 (td, 1 H, H<sub>4</sub>', <sup>3</sup>J<sub>HH</sub> = 7.2, <sup>4</sup>J<sub>HH</sub> = 1.2 Hz), 7.25 (m, partially obscured by the resonance of traces of CHCl<sub>3</sub> present in the deuterated solvent, 1 H, H<sub>4</sub>), 7.34–7.37 (m, 2 H, H<sub>2</sub> + H<sub>3</sub>) 7.44 (dd, 1 H, H<sub>5</sub>', <sup>3</sup>J<sub>HH</sub> = 7.6, <sup>4</sup>J<sub>HH</sub> = 1.2 Hz), 8.14 (br d, 2 H, *o*-H pic, <sup>3</sup>J<sub>HH</sub> = 6.4 Hz). <sup>13</sup>C{<sup>1</sup>H} NMR (75.45 MHz): δ 20.9 (s, Me, pic), 28.0 (s, Me, CMe<sub>2</sub>), 35.1 (s, Me, CMe<sub>2</sub>), 44.7 (s, CH<sub>2</sub>Ar), 56.1 (s, CMe<sub>2</sub>), 123.7 (s, CH, C<sub>3</sub>'), 125.1 (s, *m*-CH, pic), 126.1 (s, CH, C<sub>4</sub>), 126.3 (s, CH, C<sub>4</sub>'), 126.5 (s, CH, C<sub>3</sub>), 126.9 (s, CH, C<sub>2</sub>'), 128.6 (s, CH, C<sub>5</sub>), 132.4 (s, CH, C<sub>2</sub>), 133.3 (s, CH, C<sub>5</sub>'), 135.9 (s, C<sub>1</sub>), 146.4 (s, C<sub>6</sub>), 147.2 (s, C<sub>1</sub>'), 148.9 (s, *p*-C, pic), 150.9 (s, C<sub>6</sub>'), 151.5 (s, *o*-CH, pic). Single crystals suitable for an X-ray diffraction study were obtained by slow diffusion of *n*-pentane into a solution of **2a** in CHCl<sub>3</sub>.

**Synthesis of [Pd (C,N-C<sub>6</sub>H<sub>4</sub>{(C<sub>6</sub>H<sub>2</sub>CH<sub>2</sub>CH<sub>2</sub>NH<sub>2</sub>-2,(OMe)<sub>2</sub>-4,5)-2'})Br(PPh<sub>3</sub>)] (2b).** PPh<sub>3</sub> (59 mg, 0.225 mmol) was added to a solution of complex **1b** (100 mg, 0.113 mmol) in CH<sub>2</sub>Cl<sub>2</sub> (25 mL), and the resulting solution was stirred for 30 min. The mixture was filtered through a plug of Celite, the filtrate was concentrated to ca. 2 mL, and Et<sub>2</sub>O (30 mL) was added. The suspension was filtered, and the solid was washed with Et<sub>2</sub>O (2 x 5 mL) and air-dried to give a first crop of complex **2b** as a yellow solid (86 mg). The filtrate was concentrated to ca. 2 mL, and *n*-pentane was added. The suspension was filtered, and the solid was washed with *n*-pentane (2 x 5 mL) and air-dried to give a second crop of complex **2b** as a yellow solid (25 mg). Yield: 111 mg, 0.157 mmol, 70%. An analytically pure sample of complex **2b** was obtained by recrystallization from CH<sub>2</sub>Cl<sub>2</sub>/Et<sub>2</sub>O. Mp: 151 °C. Anal. Calcd for C<sub>34</sub>H<sub>33</sub>BrNO<sub>2</sub>PPd (704.926): C, 57.93; H, 4.72; N, 1.99. Found: C, 57.90; H, 4.55; N, 1.94. IR (cm<sup>-1</sup>): ν(NH) 3304 m, 3243 w. <sup>1</sup>H NMR (300.1 MHz): δ 1.56 (br s, H<sub>2</sub>O), 2.12 (m, 1 H, CH<sub>2</sub>Ar), 2.21–2.34 (m, partially obscured by the CH<sub>2</sub>Ar signal, 1 H, NH<sub>2</sub>), 2.70 (br dd, 1 H, CH<sub>2</sub>Ar, <sup>2</sup>J<sub>HH</sub> = 15.0, <sup>3</sup>J<sub>HH</sub> = 5.4 Hz), 3.28–3.35 (m, partially obscured by the MeO signal, 1 H, CH<sub>2</sub>N), 3.38 (s, 3 H, MeO), 3.45–3.52 (m, partially obscured by the MeO signal, 1 H, CH<sub>2</sub>N), 3.53–3.61 (m, 1 H, NH<sub>2</sub>), 4.03 (s, 3 H, MeO), 5.72 (s, 1 H, H<sub>6</sub>), 6.74–6.87 (m, 2 H, H<sub>4</sub>' + H<sub>5</sub>' + H<sub>6</sub>'), 6.90 (s, 1 H, H<sub>3</sub>), 7.08–7.23 (m, 13 H, 6H *o*-H + 6 H *m*-H of PPh<sub>3</sub> and 1 H of H<sub>3</sub>'), 7.27–7.40 (m, 3 H, *p*-H, PPh<sub>3</sub>). <sup>13</sup>C{<sup>1</sup>H} NMR (75.45 MHz): δ 33.4 (s, CH<sub>2</sub>Ar), 46.5 (s, CH<sub>2</sub>N), 55.6 (s, MeO), 56.1 (s, MeO), 111.7 (s, CH, C<sub>6</sub>), 112.6 (s, CH, C<sub>3</sub>), 123.3 (s, CH, C<sub>5</sub>'), 126.6 (s, CH, C<sub>4</sub>'), 127.8 (d, *m*-CH, PPh<sub>3</sub>, <sup>3</sup>J<sub>CP</sub> = 10.7 Hz), 128.2 (s, C<sub>6</sub>'), 130.0 (d, *p*-CH, PPh<sub>3</sub>, <sup>4</sup>J<sub>CP</sub> = 2.6 Hz), 131.3 (d, *i*-C, PPh<sub>3</sub>, <sup>1</sup>J<sub>CP</sub> = 49.8 Hz), 131.4 (s, C<sub>2</sub>), 134.5 (d, *o*-CH, PPh<sub>3</sub>, <sup>2</sup>J<sub>CP</sub> = 11.6 Hz), 134.5 (d, CH, C<sub>3</sub>', <sup>3</sup>J<sub>CP</sub> = 4.8 Hz), 138.7 (s, C<sub>1</sub>), 146.1 (s, C<sub>1</sub>'), 146.9 (s, C<sub>5</sub>), 148.4 (s, C<sub>4</sub>), 155.0 (s, C<sub>2</sub>'). <sup>31</sup>P NMR (121.5 MHz): 29.3 (s). Single crystals of **2b**·CH<sub>2</sub>Cl<sub>2</sub> suitable for an X-ray diffraction study were obtained by slow diffusion of Et<sub>2</sub>O into a solution of **2b** in CHCl<sub>3</sub>.

**Synthesis of 2-(2-amino-2,2-dimethylethyl)-2'-carboxymethyl-[1,1'-biphenyl] hydrochloride (3a).** In a Carius tube, CO was bubbled through a suspension of complex **1a** (100 mg, 0.137 mmol) in MeOH (15 mL) for 3 min. The pressure of CO was increased to 1 atm and the reaction mixture was stirred for 12 h. Decomposition to palladium black was observed. The suspension was filtered through a plug of Celite, and the solvent from the colorless filtrate was removed to dryness. The residue was dissolved in CH<sub>2</sub>Cl<sub>2</sub> (1 mL), and *n*-

S5

pentane (25 mL) was added. The resulting suspension was filtered, and the solid was washed with *n*-pentane (2 x 5 mL) and air-dried to afford compound **3a** as a colorless solid. Yield: 64 mg, 0.200 mmol, 73%. Mp: 78 °C. IR (cm<sup>-1</sup>):  $\nu$ (NH) 3391 (br);  $\nu$ (CO) = 1727 (vs). <sup>1</sup>H NMR (400.91 MHz):  $\delta$  1.12 (s, 3 H, Me, CMe<sub>2</sub>), 1.26 (s, 3 H, Me, CMe<sub>2</sub>), 2.78 (d, 1 H, CH<sub>2</sub>Ar, <sup>2</sup>*J*<sub>HH</sub> = 14.0 Hz), 3.21 (d, 1 H, CH<sub>2</sub>Ar, <sup>2</sup>*J*<sub>HH</sub> = 14.0 Hz), 3.62 (s, 3 H, OMe), 7.09 (m, 1 H, H5), 7.26–7.30 (m, 3 H, H2' + H3 + H4), 7.39 (m, 1 H, H2), 7.45 (t, 1 H, H4', <sup>3</sup>*J*<sub>HH</sub> = 7.6 Hz), 7.57 (t, 1 H, H3', <sup>3</sup>*J*<sub>HH</sub> = 7.6 Hz), 7.95 (d, 1 H, H5', <sup>3</sup>*J*<sub>HH</sub> = 7.6 Hz), 8.16 (br s, 3 H, NH<sub>3</sub>). <sup>13</sup>C{<sup>1</sup>H} NMR (100.81 MHz):  $\delta$  25.3 (s, Me, CMe<sub>2</sub>), 26.1 (s, Me, CMe<sub>2</sub>), 42.3 (s, CH<sub>2</sub>Ar), 52.2 (s, OMe), 56.1 (s, CMe<sub>2</sub>), 127.0 (s, CH, C4), 127.6 (s, CH, C4'), 127.8 (s, CH, C3), 130.2 (s, CH, C5), 130.45 (s, C6'), 130.48 (s, CH, C5'), 131.7 (s, CH, C2), 131.8 (s, CH, C3'), 131.9 (s, CH, C2'), 132.2 (s, C1), 141.8 (s, C1'), 141.9 (s, C6), 168.2 (s, CO). ESI-HRMS: exact mass calcd for C<sub>18</sub>H<sub>22</sub>NO<sub>2</sub> 284.16505 [(M – Cl)<sup>+</sup>]; found 284.1657;  $\Delta$  = 0.0006.

**Synthesis of 2-(2-aminoethyl)-4,5-dimethoxy-2'-carboxymethyl-[1,1'-biphenyl] hydrobromide (3b).** In a Carius tube, CO was bubbled through a suspension of complex **1b** (80 mg, 0.09 mmol) in MeOH (25 mL) for 3 min. The pressure of CO was increased to 1 atm and the reaction mixture was stirred for 16 h. Decomposition to palladium black was observed. The resulting suspension was filtered through a plug of Celite, and the solvent from the filtrate was removed to dryness. The residue was vigorously stirred in Et<sub>2</sub>O (30 mL), the suspension was filtered, and the solid was washed with Et<sub>2</sub>O (2 x 5 mL) and dried under N<sub>2</sub> atmosphere to afford compound **3b** as a colorless solid. Yield: 43 mg, 0.109 mmol, 61%. Mp: 55 °C.  $\Lambda_M$  (Ω<sup>-1</sup> cm<sup>2</sup> mol<sup>-1</sup>) = 1.66 (6.00 x 10<sup>-4</sup> M). IR (cm<sup>-1</sup>):  $\nu$ (NH) 3395 br m;  $\nu$ (CO) 1725 s. <sup>1</sup>H NMR (300.1 MHz):  $\delta$  2.55–2.72 (m, 1 H, CH<sub>2</sub>N), 3.07–3.21 (m, 3 H, 1 H of CH<sub>2</sub>N + 2 H of CH<sub>2</sub>Ar), 3.76 (s, 3 H, MeO), 3.78 (s, 3 H, MeO), 4.00 (s, 3 H, MeO), 6.44 (s, 1 H, H6), 7.15 (s, 1 H, H3), 7.30 (br d, 1 H, H6', <sup>3</sup>*J*<sub>HH</sub> = 7.8 Hz), 7.45 (“t”, 1 H, H4', <sup>3</sup>*J*<sub>HH</sub> = 7.2 Hz), 7.56 (“t”, 1 H, H5', <sup>3</sup>*J*<sub>HH</sub> = 7.8 Hz), 7.62 (br s, 3 H, NH<sub>3</sub>), 7.86 (br d, 1 H, H3', <sup>3</sup>*J*<sub>HH</sub> = 7.5 Hz). <sup>13</sup>C{<sup>1</sup>H} NMR (75.45 MHz):  $\delta$  30.1 (s, CH<sub>2</sub>Ar), 38.7 (s, CH<sub>2</sub>N), 53.0 (s, CO<sub>2</sub>Me), 56.0 (s, MeO), 56.3 (s, MeO), 112.6 (s, CH, C6), 114.4 (s, CH, C3), 124.1 (s, C2), 127.8 (s, C4'), 130.2 (s, C3'), 130.7 (s, C6'), 130.8 (s, C2'), 132.0 (s, C5'), 132.9 (s, C1), 141.2 (s, C1'), 148.0 (s, C5), 148.6 (s, C4), 169.5 (s, CO). EI-HRMS: exact mass calcd for C<sub>18</sub>H<sub>22</sub>NO<sub>4</sub> 316.1543 [(M – Br)<sup>+</sup>]; found 316.1549;  $\Delta$  = 0.0006.

S6

**Single-Crystal X-ray Structure Determinations.** Relevant crystallographic data and details of the refinements for the structures of compounds **2a** and **2b**·CH<sub>2</sub>Cl<sub>2</sub> are summarized in Table 1. Data Collection: Crystals suitable for X-ray diffraction were mounted in inert oil on a glass fiber and transferred to a Bruker SMART APEX diffractometer. Data were recorded at 100(2)K using graphite-monochromated Mo K $\alpha$  radiation ( $\lambda = 0.71073$  Å) and  $\omega$ -scan mode. Multiscan absorption corrections were applied. Solution and Refinements: Crystal structures were solved by direct method and all nonhydrogen atoms refined anisotropically on  $F^2$  using the program SHELXL-97.<sup>1</sup> Hydrogen atoms were refined as follows: NH<sub>2</sub>, free with SADI; methyl, rigid group; all others, riding.

<sup>1</sup> Sheldrick, G. M. SHELX-97; University of Göttingen, Göttingen, Germany, 1997.

S7

**Table 1.** Crystal Data and Structure Refinement Details for Complexes **2a** and **2b**·CH<sub>2</sub>Cl<sub>2</sub>.

|                                              | <b>2a</b>                                           | <b>2b</b> ·CH <sub>2</sub> Cl <sub>2</sub>                            |
|----------------------------------------------|-----------------------------------------------------|-----------------------------------------------------------------------|
| formula                                      | C <sub>22</sub> H <sub>25</sub> ClN <sub>2</sub> Pd | C <sub>35</sub> H <sub>35</sub> BrCl <sub>2</sub> NO <sub>2</sub> PPd |
| fw                                           | 459.29                                              | 789.82                                                                |
| temp (K)                                     | 100(2)                                              | 100(2)                                                                |
| cryst habit                                  | colorless block                                     | colorless lath                                                        |
| cryst size (mm)                              | 0.27 x 0.10 x 0.06                                  | 0.25 x 0.10 x 0.03                                                    |
| cryst syst                                   | triclinic                                           | triclinic                                                             |
| space group                                  | <i>P</i> $\bar{1}$                                  | <i>P</i> $\bar{1}$                                                    |
| <i>a</i> (Å)                                 | 9.2021(7)                                           | 8.8675(7)                                                             |
| <i>b</i> (Å)                                 | 10.3321(7)                                          | 13.5117(11)                                                           |
| <i>c</i> (Å)                                 | 11.8365(9)                                          | 15.0521(12)                                                           |
| $\alpha$ (deg)                               | 73.850(2)                                           | 68.116(2)                                                             |
| $\beta$ (deg)                                | 78.692(2)                                           | 79.424(2)                                                             |
| $\gamma$ (deg)                               | 65.084(2)                                           | 75.791(2)                                                             |
| <i>V</i> (Å <sup>3</sup> )                   | 976.33(12)                                          | 1613.8(2)                                                             |
| <i>Z</i>                                     | 2                                                   | 2                                                                     |
| $\rho_{\text{calcd}}$ (Mg m <sup>-3</sup> )  | 1.562                                               | 1.625                                                                 |
| $\mu$ (Mo, K $\alpha$ ) (mm <sup>-1</sup> )  | 1.095                                               | 2.062                                                                 |
| <i>F</i> (000)                               | 468                                                 | 796                                                                   |
| $\theta$ range (deg)                         | 1.80–28.60                                          | 1.66–28.71                                                            |
| no. rflns collected                          | 11 858                                              | 19 839                                                                |
| no. indep rflns                              | 4558                                                | 7568                                                                  |
| <i>R</i> <sub>int</sub>                      | 0.0182                                              | 0.0202                                                                |
| max, min transmsn                            | 0.937, 0.799                                        | 0.941, 0.829                                                          |
| no. of restraints/params                     | 1/246                                               | 1/398                                                                 |
| goodness of fit on <i>F</i> <sup>2</sup>     | 1.094                                               | 1.035                                                                 |
| R1 ( <i>I</i> > 2 $\sigma$ ( <i>I</i> ))     | 0.0220                                              | 0.0289                                                                |
| wR2 (all rflns)                              | 0.0536                                              | 0.0727                                                                |
| largest diff peak, hole (e Å <sup>-3</sup> ) | 0.506, −0.458                                       | 0.767, −0.615                                                         |

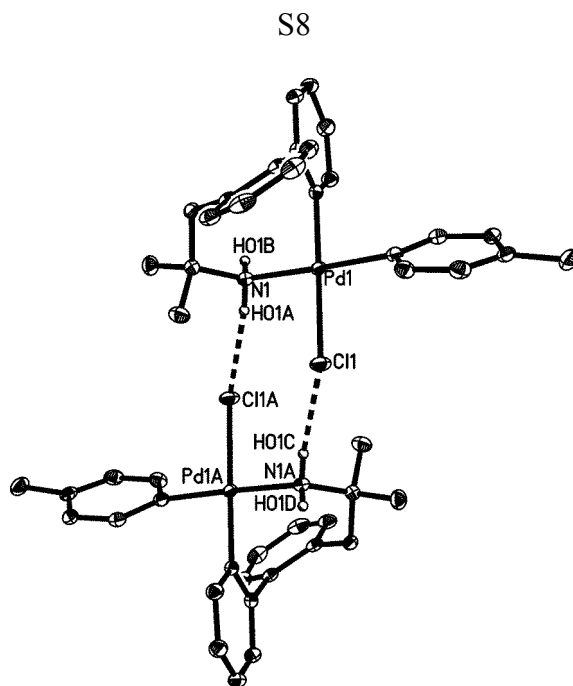

**Figure 1.** X-ray packing view of complex **2a** (50% probability) showing the dimers formed through N(1)–H(01A)···Cl(1A) hydrogen bond interactions. Symmetry operator: (A)  $1-x, -y, 2-z$ .

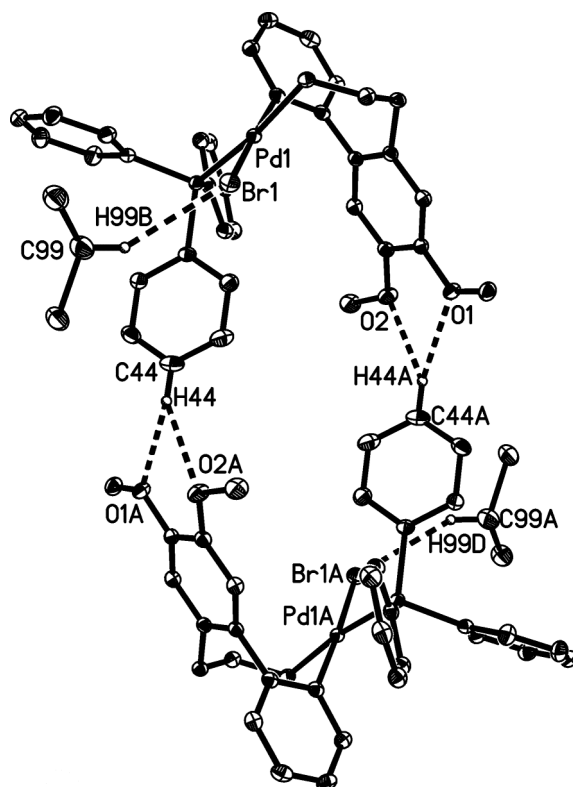

**Figure 2.** X-ray packing view of complex **2b**·CH<sub>2</sub>Cl<sub>2</sub> (50% probability) showing the dimers formed through C(44)–H(44)···O(1A) and C(44)–H(44)···O(2A) hydrogen bond interactions. Symmetry operator: (A)  $2-x, -y, 1-z$ . The C(99)–H(99B)···Br(1) hydrogen interaction with the solvent is also shown.
